# Supplementary material for: Dietary Patterns and Their Sociodemographic and Lifestyle Determinants in Switzerland: Results from the National Nutrition Survey menuCH
Source: MDPI journal article supplement (doi:10.3390/nu11010062), 2018-12-29
Supplement: s1 [file s1]

| <b>Food categories</b>  | <b>Food items included</b>                                                                                                                                                                                                                                                                                                                                                         |
|-------------------------|------------------------------------------------------------------------------------------------------------------------------------------------------------------------------------------------------------------------------------------------------------------------------------------------------------------------------------------------------------------------------------|
| Non alcoholic beverages | Sweetened soft drinks, Energy drinks, Fizzy drinks, Ice tea, Diluted syrup, Fruit juices, Drinks made with fruits juices, Smoothies, Vegetable juices, Alcohol-free beers<br><u>Except:</u> non-caloric sweetened drinks                                                                                                                                                           |
| Alcoholic beverages     | Beer, Wine, Wine products, Liquors, Cocktails, Spirits                                                                                                                                                                                                                                                                                                                             |
| Cereals & starchy       | All bread products, Pasta (plain or stuffed), Rice, Spätzle, Potatoes, Sweet potatoes, Potatoe-based products (French fries, gnocchi,...), Cereal flakes and bran, Other cereal grains (Quinoa, Barley, ...), Flours, Starches, All types of dough                                                                                                                                 |
| Red & processed meat    | Fresh meat and offal of mammals (Beef, Veal, Pork, Lamb, Mutton, Horse, Goat, Rabbit), Wildmeat, Sausages, Smoked and cured meat, Meat-based spreads, Meat-based sauces                                                                                                                                                                                                            |
| White meat              | Fresh meat and offal from chicken, turkey, duck, goose, ostrich, frog                                                                                                                                                                                                                                                                                                              |
| Fish                    | Fish, Seafood, Processed fish (Fish in crumbs, ...), Processed seafood (Surimi, ...)                                                                                                                                                                                                                                                                                               |
| Fruits & nuts           | All fruits (raw, cooked, dried, in compote, in pies), Dried nuts and seeds (Almonds, Coconut, Pumpkin Seeds, ...), Olives, Avocados.<br><u>Except:</u> Fruit juices, fruit jams, candied fruit, small amounts of fruits contained in yogurts, cakes, ice-cream or other sweets.                                                                                                    |
| Vegetables              | All vegetables, green leaves, sprouts, mushrooms, seaweeds, sweet corn, snow peas, fresh green beans, and onions: raw, cooked, dried, canned, in puree, pickled, in sauce (e.g. tomato sauce), on pizza and quiches, and in sandwiches. Legumes.<br><u>Except:</u> avocados, olives, herbs, vegetable juices, or if contained in small amounts in salty snacks, bread, nor sauces. |
| Soups                   | Vegetable soups, Vegetable or meat broth, Miso soups, Mushroom soups                                                                                                                                                                                                                                                                                                               |
| Added fats              | Butter, Other animal fats, Vegetable oil (including oil in dressings), Margarine, Mammal's cream                                                                                                                                                                                                                                                                                   |
| Eggs                    | Eggs (all consumption forms), including eggs in recipes                                                                                                                                                                                                                                                                                                                            |
| Milk & dairy            | Mammals' milk, branded fermented milk drinks, yogurt drink and buttermilk, in liquid form, Mammals' yogurt, branded fermented milk and kefir, fresh cheese (Quark, Cottage cheese, Ricotta, ...), Mammals' spread cheese, processed/melted cheese, and soft cheese, Mammals' hard cheese.                                                                                          |
| Chocolate               | Chocolate chips, Chocolate tablets, Chocolate powder, Chocolate icing, Sugar, Syrup, Jams, Honey                                                                                                                                                                                                                                                                                   |
| Cakes                   | Cakes, Biscuits, Pies, Strudel, Muffins, Waffles, Ice cream, Sorbet, Sweet pastries, Doughnuts                                                                                                                                                                                                                                                                                     |
| Savoury snacks          | Cocktail canapés, Crisps, Salty popcorn, Dried salty crackers, Crostini/bruschetta, Spring rolls, Ham croissants, Samosa and Sausage rolls.                                                                                                                                                                                                                                        |
| Sauces & seasoning      | Sauces rich in oil or butter (Mayonnaise, Pesto, Salad dressing, ...), Other sauces rich in cream or other fats (Cocktail sauce, Hummus, Satay sauce), Mustard, Wasabi paste.                                                                                                                                                                                                      |
| Others                  | Milk and yogurt substitutes (Soya milk, ...), Meat substitutes (Quorn, Vegetarian sausages, Tofu, ...), Dietetic products rich in proteins (Meal replacements, Protein shakes, ...).                                                                                                                                                                                               |

**Supplementary table 1: Description of the foods and beverages included in the 17 study categories**

This table is adapted from Chatelan *et al.* (Nutrients, 2017)

|                                                  | Swiss traditional | Western 1 - soft drinks and meat | Western 2 - alcohol, meat and starchy | Prudent     |
|--------------------------------------------------|-------------------|----------------------------------|---------------------------------------|-------------|
| <b>Participants; N</b>                           | 744 (36.2%)       | 383 (18.6%)                      | 444 (21.6%)                           | 486 (23.6%) |
| <b>Sex</b>                                       |                   |                                  |                                       |             |
| <i>Males</i>                                     | 38.8%             | 56.4%                            | 59.2%                                 | 34.0%       |
| <i>Females</i>                                   | 61.2%             | 43.6%                            | 40.8%                                 | 66.0%       |
| <b>Age groups<sup>1</sup></b>                    |                   |                                  |                                       |             |
| 18-29 years old                                  | 17.6%             | 27.4%                            | 21.4%                                 | 14.2%       |
| 30-44 years old                                  | 26.3%             | 29.8%                            | 25.0%                                 | 23.0%       |
| 45-59 years old                                  | 30.1%             | 29.5%                            | 28.8%                                 | 32.9%       |
| 60-75 years old                                  | 25.9%             | 13.3%                            | 24.8%                                 | 29.8%       |
| <b>BMI categories<sup>2</sup></b>                |                   |                                  |                                       |             |
| Underweight ( $BMI < 18.5 \text{ kg/m}^2$ )      | 2.7%              | 2.1%                             | 1.6%                                  | 3.3%        |
| Normal ( $18.5 \leq BMI < 25 \text{ kg/m}^2$ )   | 57.1%             | 50.9%                            | 50.9%                                 | 55.3%       |
| Overweight ( $25 \leq BMI < 30 \text{ kg/m}^2$ ) | 30.1%             | 29.2%                            | 34.9%                                 | 28.4%       |
| Obese ( $BMI \geq 30 \text{ kg/m}^2$ )           | 10.1%             | 17.8%                            | 12.6%                                 | 13.0%       |
| <b>Language region<sup>3</sup></b>               |                   |                                  |                                       |             |
| German-speaking                                  | 71.8%             | 66.3%                            | 61.7%                                 | 57.4%       |
| French-speaking                                  | 19.8%             | 26.4%                            | 22.5%                                 | 31.7%       |
| Italian-speaking                                 | 8.5%              | 7.3%                             | 15.8%                                 | 10.9%       |
| <b>Nationality</b>                               |                   |                                  |                                       |             |
| Swiss                                            | 78.4%             | 70.5%                            | 72.1%                                 | 65.6%       |
| Swiss binationals                                | 12.6%             | 14.6%                            | 12.8%                                 | 18.5%       |
| Other                                            | 9.0%              | 14.9%                            | 15.1%                                 | 15.8%       |
| <b>Education, highest degree</b>                 |                   |                                  |                                       |             |
| Primary school or no degree                      | 3.8%              | 4.7%                             | 4.1%                                  | 5.1%        |
| Secondary                                        | 46.5%             | 49.6%                            | 50.9%                                 | 42.4%       |
| Tertiary                                         | 49.6%             | 45.4%                            | 45.0%                                 | 52.3%       |
| <b>Marital status; %</b>                         |                   |                                  |                                       |             |
| Single                                           | 28.8%             | 37.9%                            | 35.1%                                 | 24.5%       |
| Married                                          | 60.2%             | 50.7%                            | 49.8%                                 | 53.9%       |
| Divorced                                         | 8.6%              | 9.4%                             | 11.0%                                 | 15.2%       |
| Other                                            | 2.3%              | 1.8%                             | 4.1%                                  | 6.2%        |
| <b>Gross household income (CHF/month)</b>        |                   |                                  |                                       |             |
| < 6,000                                          | 17.3%             | 14.6%                            | 18.2%                                 | 16.5%       |
| 6,000 to 13,000                                  | 41.1%             | 43.9%                            | 39.2%                                 | 39.7%       |
| > 13,000                                         | 14.5%             | 13.8%                            | 13.3%                                 | 13.4%       |
| Imputed                                          | 27.0%             | 27.7%                            | 29.3%                                 | 30.5%       |
| <b>Self-reported physical activity</b>           |                   |                                  |                                       |             |
| Low                                              | 11.0%             | 15.1%                            | 11.5%                                 | 12.3%       |
| Moderate                                         | 22.7%             | 18.3%                            | 22.5%                                 | 23.9%       |
| High                                             | 40.9%             | 40.2%                            | 39.6%                                 | 39.7%       |
| Imputed                                          | 25.4%             | 26.4%                            | 26.4%                                 | 24.1%       |
| <b>Smoking</b>                                   |                   |                                  |                                       |             |
| Never smoker                                     | 52.0%             | 43.3%                            | 33.1%                                 | 44.0%       |
| Former smoker                                    | 34.1%             | 25.1%                            | 37.2%                                 | 35.6%       |
| Current smoker                                   | 13.7%             | 31.1%                            | 29.7%                                 | 20.2%       |
| <b>Self-reported health</b>                      |                   |                                  |                                       |             |
| Very bad to medium                               | 11.7%             | 12.8%                            | 16.9%                                 | 12.6%       |
| Good to very good                                | 88.2%             | 86.7%                            | 83.1%                                 | 87.2%       |
| <b>Currently on a weight-loss diet</b>           |                   |                                  |                                       |             |
| No                                               | 95.4%             | 95.3%                            | 96.4%                                 | 89.9%       |
| Yes                                              | 4.4%              | 4.2%                             | 3.6%                                  | 9.9%        |

**Supplementary table 2: Characteristics of the study participants by dietary pattern**

<sup>1</sup> Age is the self-reported age on the day the dietary and physical activity behavior questionnaire was filled.

<sup>2</sup> BMI was obtained from measured height and weight. Self-reported weight or height were used when measurements were impossible. For lactating and pregnant women, self-reported weight before pregnancy was used to calculate BMI.

<sup>3</sup> German-speaking region includes the cantons of Aargau, Basel-Land, Basel-Stadt, Bern, Lucerne, St. Gallen, Zurich; French-speaking region: Geneva, Jura, Neuchatel, Vaud, and Italian-speaking region: Ticino.

Number of imputed values are not shown for variables with less than 0.2% of missing values (0 to 4).

Abbreviations: 24HDR, 24-hour dietary recall; CHF, Swiss Francs

**A**

| Method                                | Criteria                                                                                                | Number of dimensions to retain | See panel |
|---------------------------------------|---------------------------------------------------------------------------------------------------------|--------------------------------|-----------|
| Scree plot                            | Break(s) in scree plot of eigenvalues over the dimensions                                               | 3, possibly 6                  | B         |
| Eigenvalues                           | Dimensions associated with eigenvalues > 1                                                              | 3                              | B         |
| Guttman-Kaiser rule                   | Dimensions associated with an eigenvalue above the mean of all eigenvalues                              | 15                             | B         |
| Joliffe rule                          | Dimensions associated with an eigenvalue above 70% of the mean of all eigenvalues                       | 26                             | B         |
| Log-eigenvalue diagram                | Log of eigenvalues corresponding to 'noise' should decrease linearly                                    | 6                              | C         |
| Total variance                        | Other authors with similar approach chose dimensions associated with at least 25% of the total variance | at least 5                     | D         |
| Velicer Minimum Average Partial (MAP) | Dimension associated with the lowest MAP                                                                | 4                              | E         |

**B**

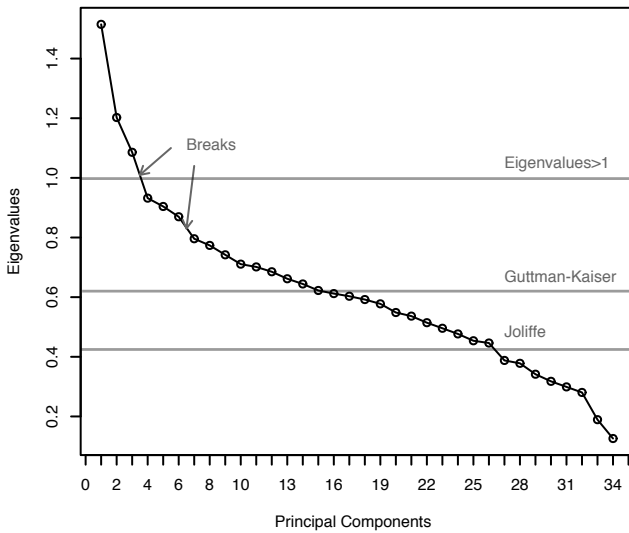

**C**

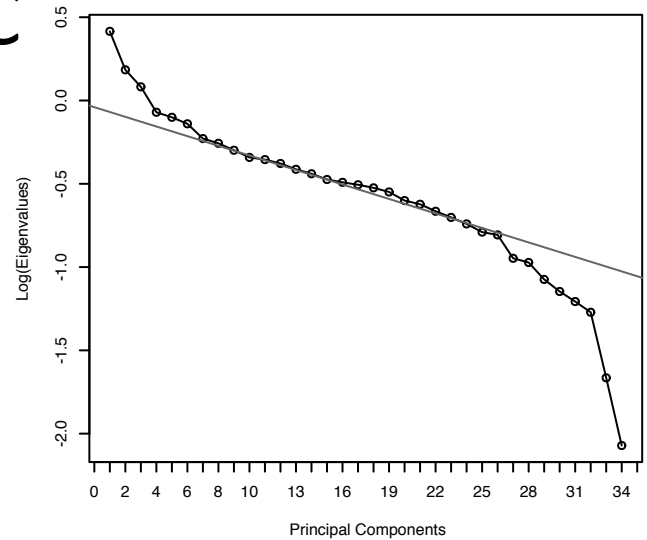

**D**

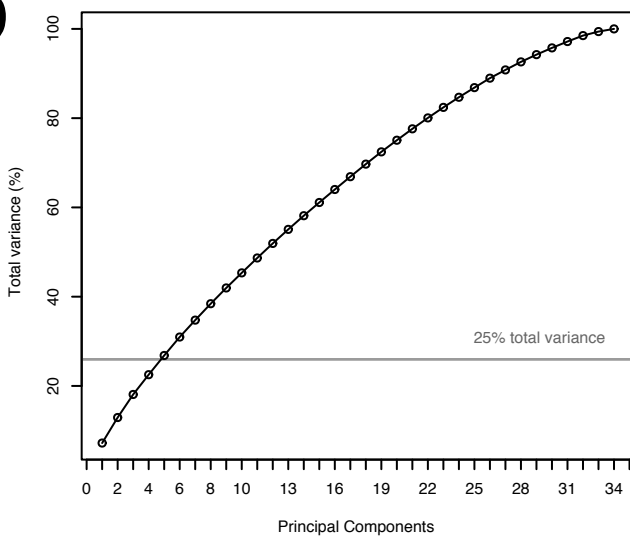

**E**

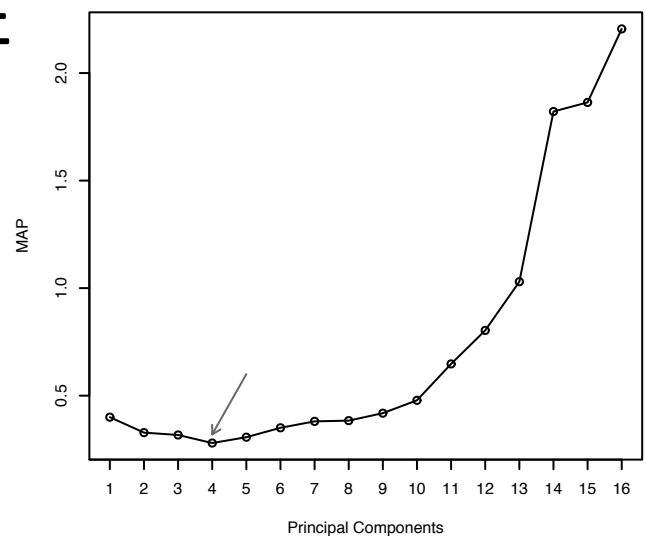

**Supplementary figure 1: Synthesis of approaches used to choose the number of principal components to retain**

A. Summary table of the stopping rules used. B. Tree plot, C. Log-eigenvalue diagram, D. Total variance explained and E. Velicer's Minimum Average Partial (MAP) of the multiple factorial analysis.

**A**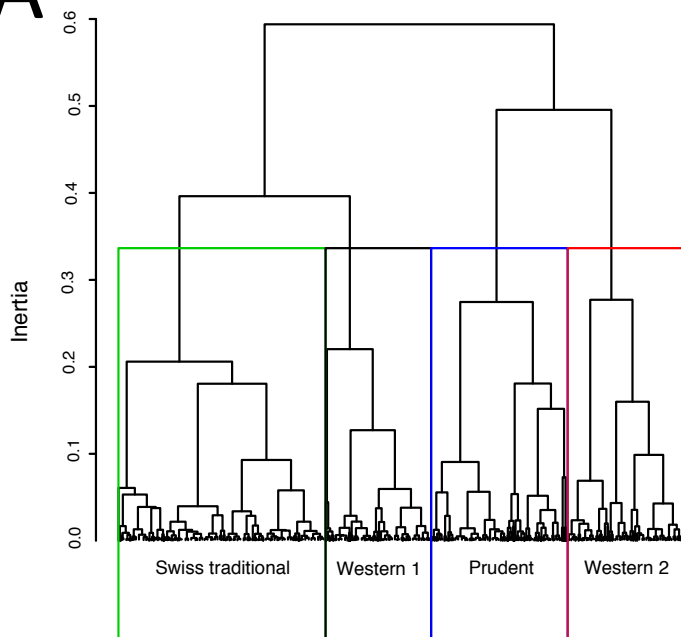**B**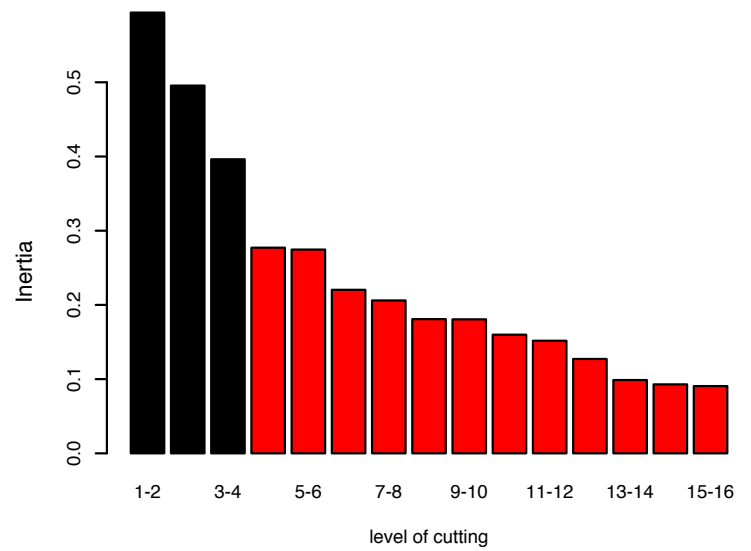

### Supplementary figure 2: Changes in inter-cluster inertia indicates a robust partition with four clusters

A. Cluster dendrogram obtained by hierarchical clustering on the seven first principal components of the multiple factorial analysis. B. Changes in inter-cluster inertia between partitions containing  $n$  or  $n+1$  clusters.

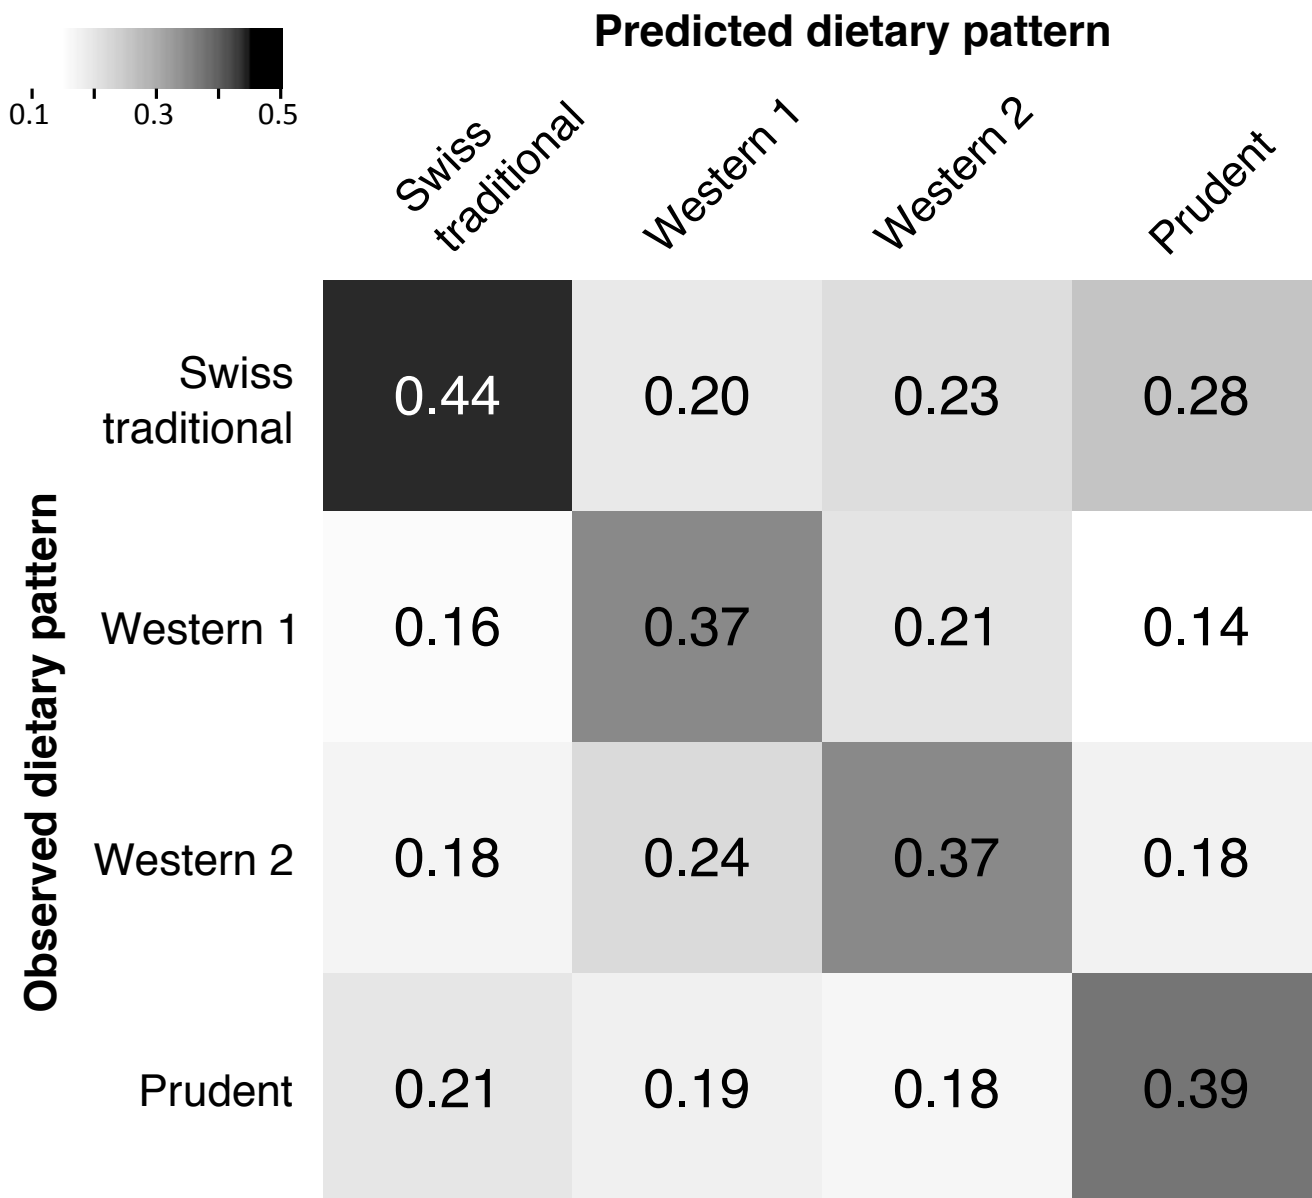

**Supplementary figure 3: Confusion matrix of the multinomial logistic regression on the determinants of dietary patterns**

Figures indicate the percentage of individuals following a dietary pattern among those predicted to follow a certain dietary pattern by the multinomial logistic regression.
